# Supplementary material for: Effects of extrathoracic mechanical ventilation on pulmonary hypertension secondary to lung disease
Source: Springer Nature journal article supplement (doi:10.1007/s00540-016-2172-7), 2016-04-18
Supplement: MOESM1 [file 10029936]

Effects of extrathoracic mechanical ventilation on pulmonary hypertension from lung disease

Journal of Anesthesia

Yoko Sato, Noriyuki Saeki, Takuma Asakura, Kazutetsu Aoshiha, Toru Kotani

Corresponding Author: Yoko Sato, MD

Department of Anesthesiology and Intensive Care Medicine, Tokyo Women's Medical University, E-mail: [yok.s@nifty.com](mailto:yok.s@nifty.com)

### **Online figure legend**

Video 1a The CT appearance around thoracic diaphragm of spontaneously by healthy volunteer

Video 1b The CT appearance around thoracic diaphragm control mode of BCV by healthy volunteer
